# Supplementary material for: TiO2/g-C3N4heterojunction hollow porous nanofibers as superior visible-light photocatalysts for H2evolution and dye degradation
Source: Royal Society of Chemistry journal article supplement (doi:10.1039/d1nj04390k), 2021-01-01
Supplement: d1nj04390k1.pdf [file d1nj04390k1.pdf]

Electronic Supplementary Material (ESI) for New Journal of Chemistry.

This journal is © The Royal Society of Chemistry and the Centre National de la Recherche Scientifique 2021

**TiO<sub>2</sub>/g-C<sub>3</sub>N<sub>4</sub> heterojunction hollow porous nanofibers as superior visible-light photocatalysts  
for H<sub>2</sub> evolution and dye degradation**

Jing Liu,<sup>a</sup> Dianming Li,<sup>a</sup> Xiaofeng Liu,<sup>b</sup> Jie Zhou,<sup>a</sup> Hong Zhao,<sup>c</sup> Nü Wang,<sup>a</sup> Zhimin Cui,<sup>\*a</sup> Jie Bai,<sup>b</sup>  
and Yong Zhao<sup>\*a</sup>

a. Key Laboratory of Bioinspired Smart Interfacial Science and Technology of Ministry of Education, Beijing Key Laboratory of Bioinspired Energy Materials and Devices, School of Chemistry, Beijing Advanced Innovation Center for Biomedical Engineering, Beihang University, Beijing, 100191 (P. R. China). E-mail: zhaoyong@buaa.edu.cn; cuizhm@buaa.edu.cn

b. Inner Mongolia Key Laboratory of Industrial Catalysis, Chemical Engineering College. Inner Mongolia University of Technology, Hohhot, 010051 (P. R. China).

c. Beijing University of Chemical Technology, Beijing 100029 (P. R. China).

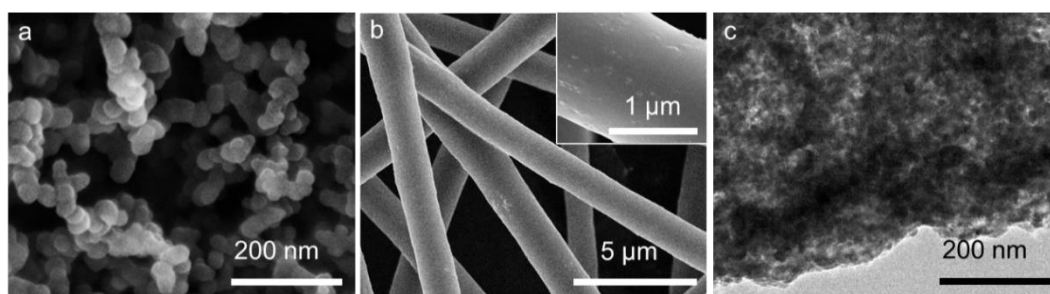

**Fig. S1** a) SEM image of C-NPs. b) SEM image of pristine TBOT/C-NPs/PVP nanofibers. The inset is high magnification micrograph. c) TEM image of HP-TiO<sub>2</sub> nanofibers.

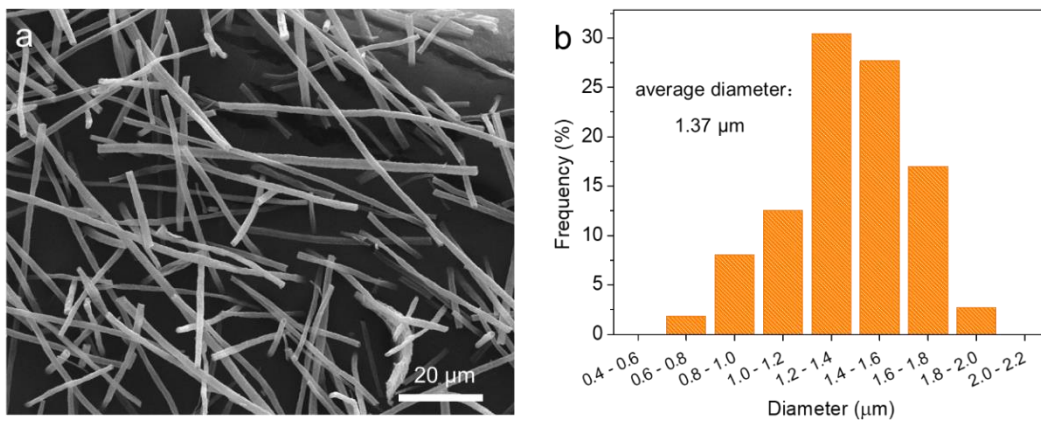

**Fig. S2** a) SEM image of HP-TiO<sub>2</sub> nanofibers. b) Diameter distribution of HP-TiO<sub>2</sub> nanofibers. The average diameter is 1.37 μm.

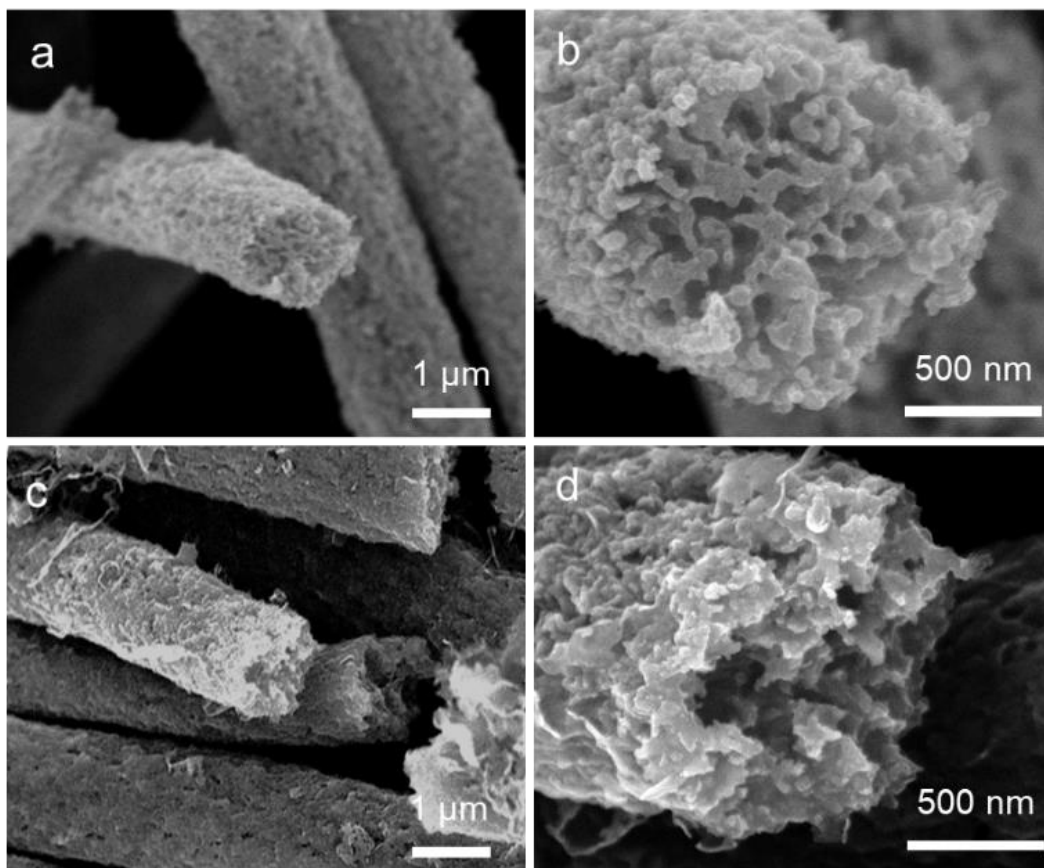

**Fig. S3** SEM images of a) P-TiO<sub>2</sub> nanofibers and c) P-TiO<sub>2</sub>/C<sub>3</sub>N<sub>4</sub>-50% composite nanofibers. b, d)

The magnified SEM images of image a and b.

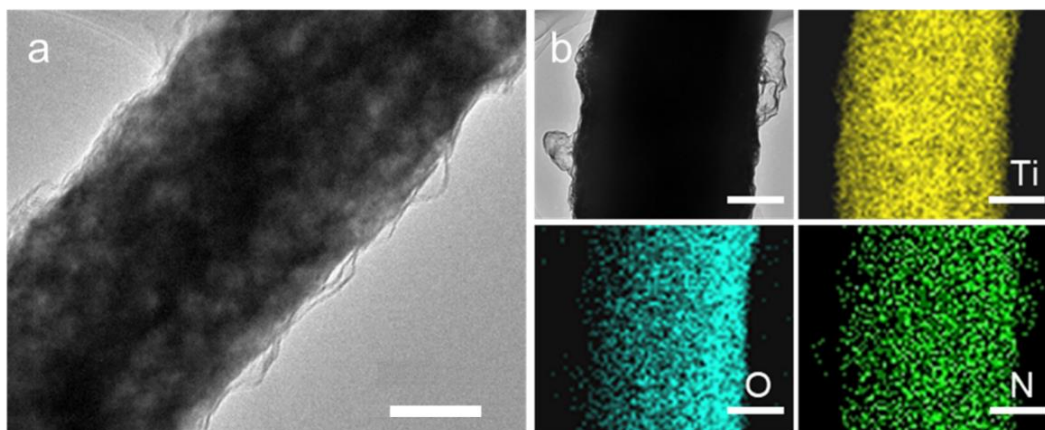

**Fig. S4** a) HR-TEM image of P-TiO<sub>2</sub>/C<sub>3</sub>N<sub>4</sub>-50% nanofibers. b) EDS element mapping images for P- TiO<sub>2</sub>/C<sub>3</sub>N<sub>4</sub>-50% nanofibers, indicating the existence of Ti, O, N. Scale bars are 500 nm.

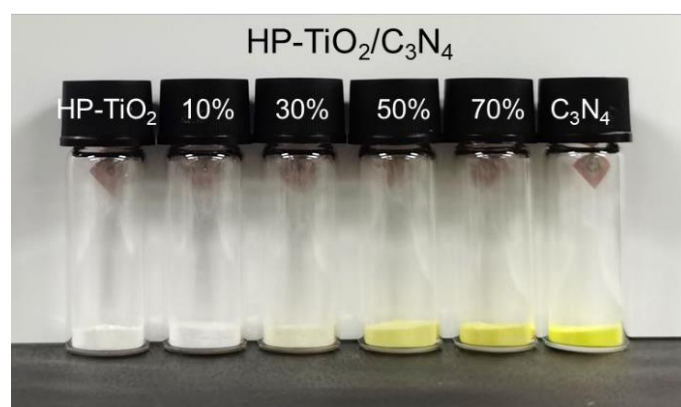

**Fig. S5** Optical images of HP-TiO<sub>2</sub>, HP-TiO<sub>2</sub>/C<sub>3</sub>N<sub>4</sub> nanofibers decorated with different content of g-C<sub>3</sub>N<sub>4</sub> (10%, 30%, 50% and 70%) and pristine g-C<sub>3</sub>N<sub>4</sub>.

In order to investigate the effect of g-C<sub>3</sub>N<sub>4</sub> content in the heterojunction catalysts. Different concentration of CY solution was used to synthesis HP-TiO<sub>2</sub>/C<sub>3</sub>N<sub>4</sub> nanofibers. The as prepared HP-TiO<sub>2</sub>/C<sub>3</sub>N<sub>4</sub> nanofibers are labelled as HP-TiO<sub>2</sub>/C<sub>3</sub>N<sub>4</sub>-x (x=10%, 30%, 50%, 70%), where x indicates the volume concentration of CY aqueous solution. Meanwhile, bare HP-TiO<sub>2</sub> nanofibers and g-C<sub>3</sub>N<sub>4</sub> were also fabricated by the same processes as above. Pristine g-C<sub>3</sub>N<sub>4</sub> presents typical faint yellow. HP-TiO<sub>2</sub> nanofibers show purely white, while composite nanofibers reveal diverse yellows from light to dark, resulting from different content of g-C<sub>3</sub>N<sub>4</sub> coated on the TiO<sub>2</sub> substrate. As the

concentration of CY aqueous solution increases, the color of composite photocatalyst gets darker (Figure S5). Pure S-TiO<sub>2</sub> nanofibers without adding C nanoparticles in the precursor, exhibit relative smooth surface (Fig. S6a). Bare HP-TiO<sub>2</sub> nanofibers exhibit hollow and porous structure (Fig. S6b). Morphologies of HP-TiO<sub>2</sub>/C<sub>3</sub>N<sub>4-x</sub> nanofibers are shown in Fig. S6c-e. It is obvious that in the low concentration of 30% CY, g-C<sub>3</sub>N<sub>4</sub> roots into the mesoporous nanofibers and form a uniform layer attached to the nanofiber tightly. With the concentration of CY solution increasing to 50%, g-C<sub>3</sub>N<sub>4</sub> nanosheets aggregate on the surface of nanofibers and form a thin layer around the TiO<sub>2</sub> nanofiber substrate and form some bubbles on parts of the nanofibers. When the concentration adds to 70%, the nanosheets aggregate closely both on the outer and inner spaces of HP-TiO<sub>2</sub> nanofibers. It is obviously that clusters of g-C<sub>3</sub>N<sub>4</sub> nanosheets block the hollow space of HP-TiO<sub>2</sub> nanofibers. As a contrast, S-TiO<sub>2</sub>/C<sub>3</sub>N<sub>4</sub>-50% was observed that the g-C<sub>3</sub>N<sub>4</sub> nanosheets gather independently from S-TiO<sub>2</sub> nanofibers with only small part contacting to the substrate (Fig. S6f). It confirms that the g-C<sub>3</sub>N<sub>4</sub> nanosheets are in situ grown on both outside and inside of HP-TiO<sub>2</sub> nanofibers due to the hollow porous structure of substrate.

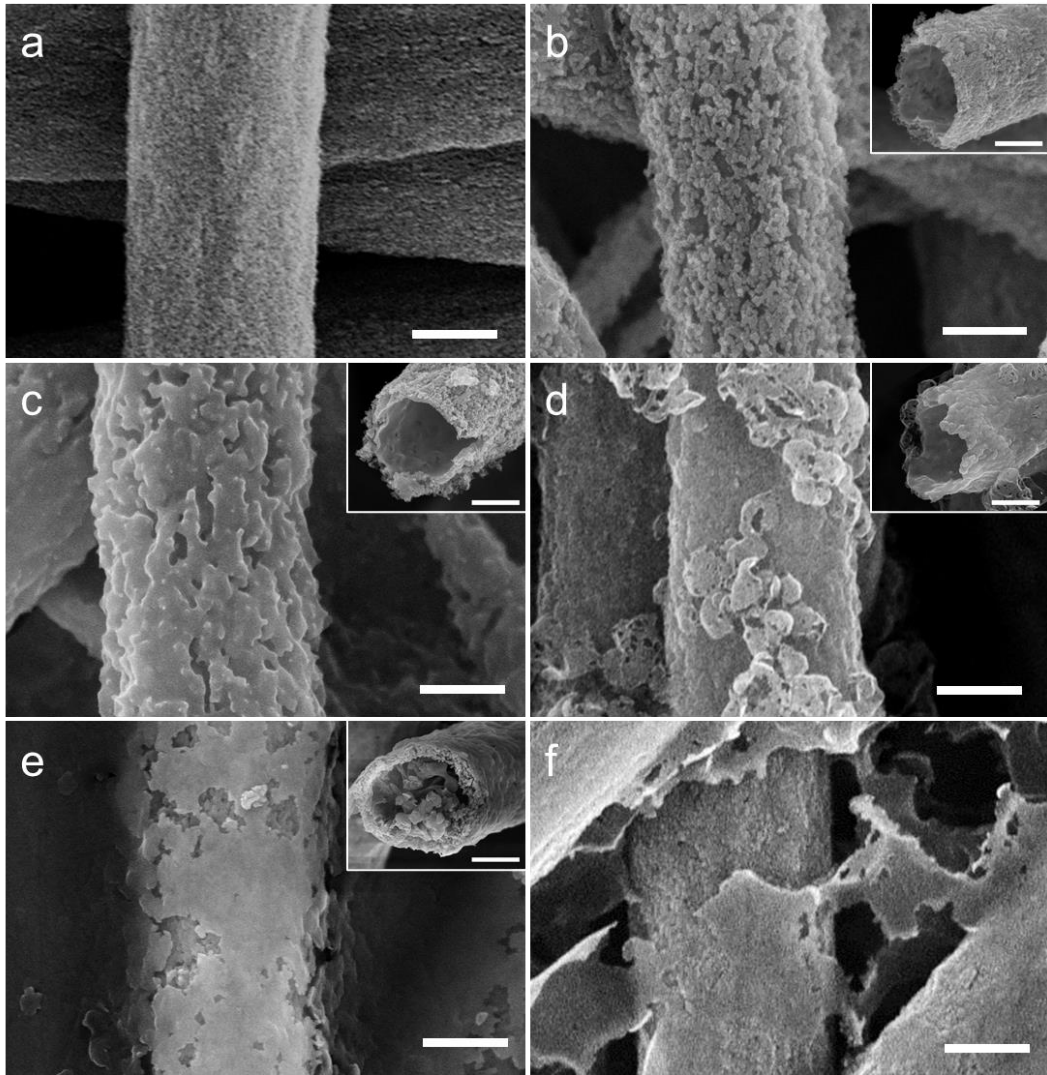

**Fig. S6** SEM images of a) S-TiO<sub>2</sub> nanofibers, b) HP-TiO<sub>2</sub> nanofibers, c-e) HP-TiO<sub>2</sub>/C<sub>3</sub>N<sub>4</sub>-30%, HP-TiO<sub>2</sub>/C<sub>3</sub>N<sub>4</sub>-50% and HP-TiO<sub>2</sub>/C<sub>3</sub>N<sub>4</sub>-70%, f) S-TiO<sub>2</sub>/C<sub>3</sub>N<sub>4</sub>-50% nanofibers. Insets show cross section images of HP-TiO<sub>2</sub>, HP-TiO<sub>2</sub>/C<sub>3</sub>N<sub>4</sub>-30%~70% and S-TiO<sub>2</sub>/C<sub>3</sub>N<sub>4</sub>-50% nanofibers. Scale bars are 500 nm.

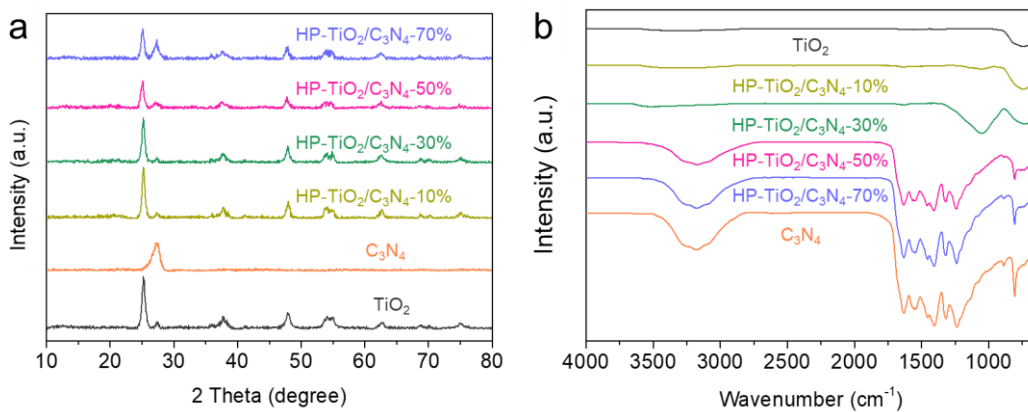

**Fig. S7** a, b) XRD patterns and FTIR images of TiO<sub>2</sub>, HP-TiO<sub>2</sub>/C<sub>3</sub>N<sub>4</sub>-10%~70% and g-C<sub>3</sub>N<sub>4</sub>.

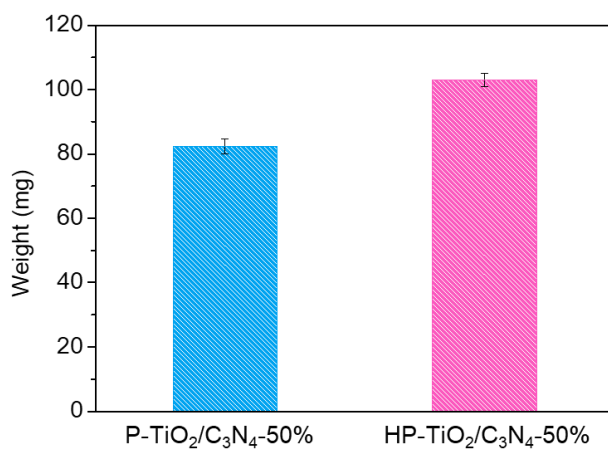

**Fig. S8** The average weight of P-TiO<sub>2</sub>/C<sub>3</sub>N<sub>4</sub>-50% and HP-TiO<sub>2</sub>/C<sub>3</sub>N<sub>4</sub>-50% derived by immersing 50 mg P-TiO<sub>2</sub> and HP-TiO<sub>2</sub> in 50% CY solution followed by calcination.

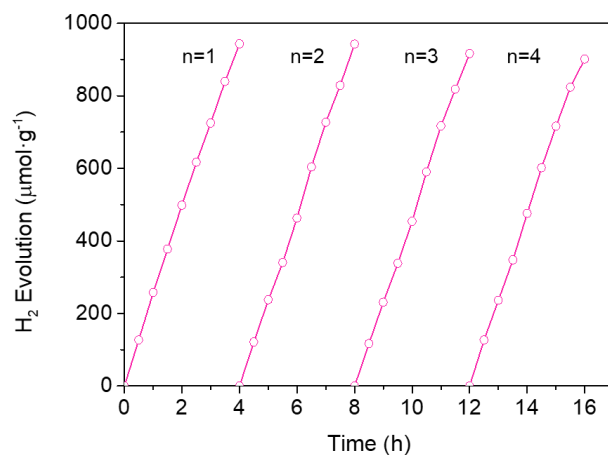

**Fig. S9.** Cyclic runs for the photocatalytic H<sub>2</sub> production over HPTCN- 50%.

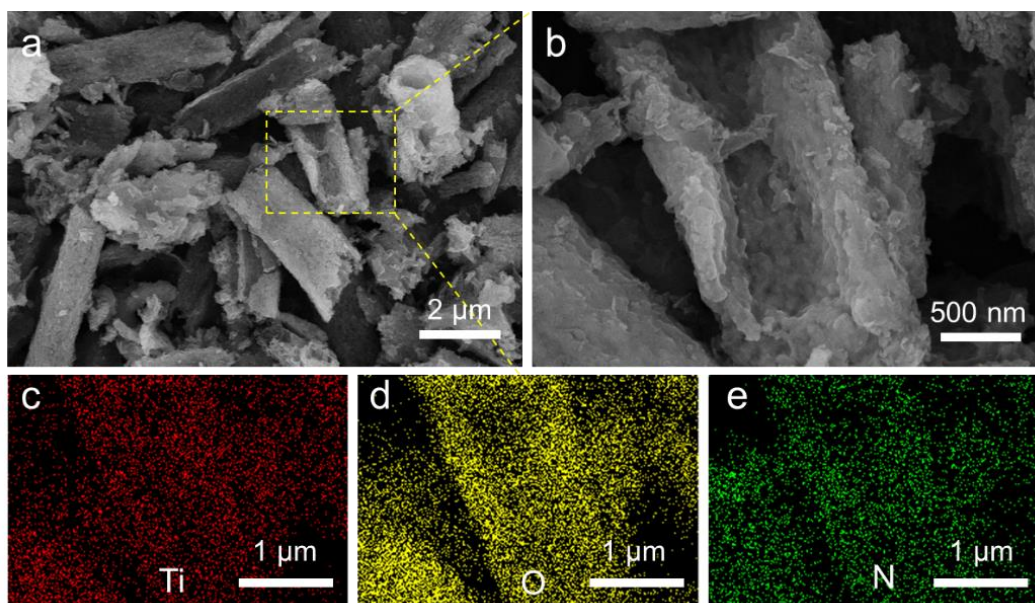

**Fig. S10** The morphology and elemental mapping images of HP-TiO<sub>2</sub>/C<sub>3</sub>N<sub>4</sub>-50% after four cycling tests. a, b) SEM images of HP-TiO<sub>2</sub>/C<sub>3</sub>N<sub>4</sub>-50% nanofibers. c-d) Elemental mapping images for HP-TiO<sub>2</sub>/C<sub>3</sub>N<sub>4</sub>-50% nanofibers indicating the existence of Ti, O, N.

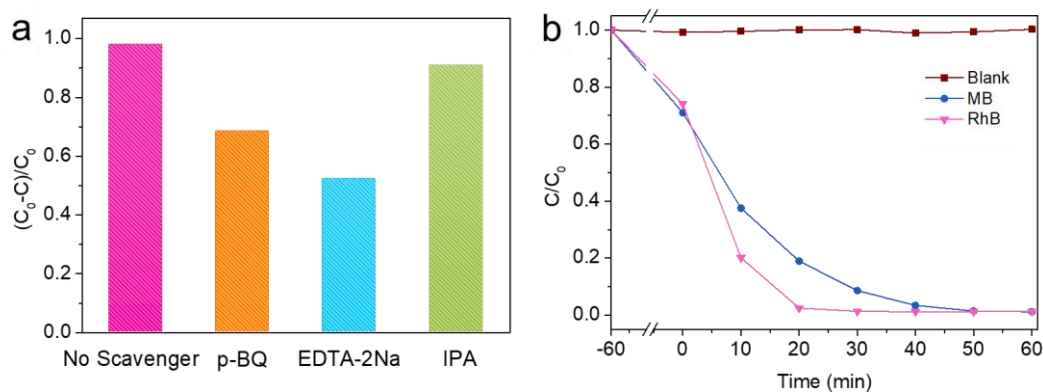

**Fig. S11** a) Reactive species trapping during RhB photodegradation over HP-TiO<sub>2</sub>/C<sub>3</sub>N<sub>4</sub>-50% under visible irradiation for 20 min. b) Photocatalytic curves of HP-TiO<sub>2</sub>/C<sub>3</sub>N<sub>4</sub>-50% for degradation of RhB and MB solution under visible light.

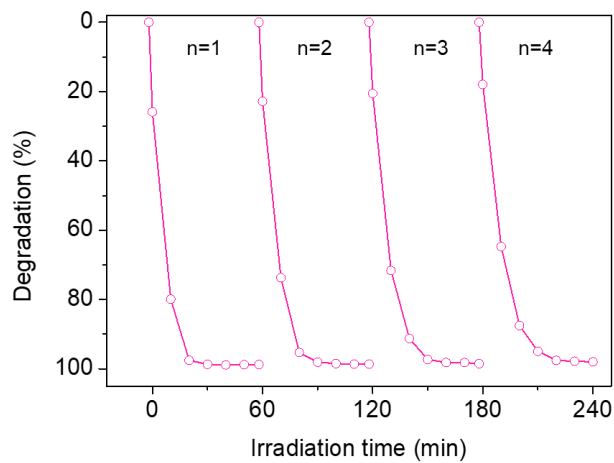

**Fig. S12.** Cyclic runs for the photocatalytic RhB degradation over HPTCN- 50%.

**Tab. S1**  $S_{\text{BET}}$  and pore volume of samples

| Samples                                                 | BET Surface Area ( $\text{cm}^3 \cdot \text{g}^{-1}$ ) | Pore Volume ( $\text{cm}^3 \cdot \text{g}^{-1}$ ) |
|---------------------------------------------------------|--------------------------------------------------------|---------------------------------------------------|
| S-TiO <sub>2</sub>                                      | 38.02                                                  | 0.10                                              |
| HP-TiO <sub>2</sub>                                     | 50.18                                                  | 0.20                                              |
| HP-TiO <sub>2</sub> /C <sub>3</sub> N <sub>4</sub> -50% | 22.36                                                  | 0.09                                              |
| g-C <sub>3</sub> N <sub>4</sub>                         | 13.20                                                  | 0.05                                              |



**Tab. S2** Visible light performance of TiO<sub>2</sub>/g-C<sub>3</sub>N<sub>4</sub> photocatalyst with different structures

| Photocatalyst                                                          | Cocatalyst | Size                   | Light Condition                     | H <sub>2</sub> Production<br>( $\mu\text{mol}\cdot\text{g}^{-1}\cdot\text{h}^{-1}$ ) | Ref.        |
|------------------------------------------------------------------------|------------|------------------------|-------------------------------------|--------------------------------------------------------------------------------------|-------------|
| TiO <sub>2</sub> /g-C <sub>3</sub> N <sub>4</sub><br>nanowire          | 1 wt% Pt   | ~150 nm                | 300W Xe lamp<br>( $\lambda>420$ nm) | 63.7                                                                                 | [1]         |
| TiO <sub>2</sub> /g-C <sub>3</sub> N <sub>4</sub><br>nanosphere        | 1 wt% Pt   | ~150 nm                | 300W Xe lamp<br>( $\lambda>400$ nm) | 64.0                                                                                 | [2]         |
| TiO <sub>2</sub> /g-C <sub>3</sub> N <sub>4</sub><br>nanoparticle      | 1 wt% Pt   | ~250 nm                | 300W Xe lamp<br>( $\lambda>420$ nm) | 80.4                                                                                 | [3]         |
| TiO <sub>2</sub> /g-C <sub>3</sub> N <sub>4</sub><br>nanosheet         | unknown    | -                      | 350W Xe lamp<br>( $\lambda>420$ nm) | 210.0                                                                                | [4]         |
| TiO <sub>2</sub> /g-C <sub>3</sub> N <sub>4</sub><br>microsphere       | 0.5 wt% Pt | ~10 $\mu\text{m}$      | 300W Xe lamp<br>( $\lambda>420$ nm) | 250.0                                                                                | [5]         |
| TiO <sub>2</sub> /g-C <sub>3</sub> N <sub>4</sub><br>hollow nanosphere | unknown    | ~250 nm                | 300W Xe lamp<br>(AM 1.5)            | 195.0                                                                                | [6]         |
| TiO <sub>2</sub> /g-C <sub>3</sub> N <sub>4</sub><br>nanofiber         | 1 wt% Pt   | ~1.41<br>$\mu\text{m}$ | 300W Xe lamp<br>( $\lambda>420$ nm) | 189.8                                                                                | our<br>work |
| TiO <sub>2</sub> /g-C <sub>3</sub> N <sub>4</sub><br>hollow nanofiber  | 1 wt% Pt   | ~1.37<br>$\mu\text{m}$ | 300W Xe lamp<br>( $\lambda>420$ nm) | 257.8                                                                                | our<br>work |

In comparison with other TiO<sub>2</sub>/C<sub>3</sub>N<sub>4</sub> photocatalyst, hollow porous TiO<sub>2</sub>/C<sub>3</sub>N<sub>4</sub> nanofiber structure exhibits high performance, with about 4 times higher than the nanowire and nanosphere structure, 3.2 times the nanoparticle structure and 1.2 times the nanosheet structure. When compared with solid nanofiber (prepared in the same method by ourselves) and hollow nanosphere, HP-TiO<sub>2</sub>/C<sub>3</sub>N<sub>4</sub> improves H<sub>2</sub> evolution performance by a further 35.8% and 31.8%.

## References

- [1] H. Chen, Y. Xie, X. Sun, M. Lv, F. Wu, L. Zhang, L. Li, X. Xu, Efficient charge separation based on type-II g-C<sub>3</sub>N<sub>4</sub>/TiO<sub>2</sub>-B nanowire/tube heterostructure photocatalysts, *Dalton Trans.*, 44 (2015) 13030-13039. <https://doi.org/10.1039/c5dt01757b>
- [2] X. Wei, C. Shao, X. Li, N. Lu, K. Wang, Z. Zhang, Y. Liu, Facile in situ synthesis of plasmonic nanoparticles-decorated g-C<sub>3</sub>N<sub>4</sub>/TiO<sub>2</sub> heterojunction nanofibers and comparison study of their photosynergistic effects for efficient photocatalytic H<sub>2</sub> evolution, *Nanoscale*, 8 (2016) 11034-11043. <https://doi.org/10.1039/c6nr01491g>
- [3] C. Li, Z. Lou, Y. Yang, Y. Wang, Y. Lu, Z. Ye, L. Zhu, Hollowsphere Nanoheterojunction of g-C<sub>3</sub>N<sub>4</sub>@TiO<sub>2</sub> with High Visible Light Photocatalytic Property, *Langmuir*, 35 (2019) 779-786. <https://doi.org/10.1021/acs.langmuir.8b03867>
- [4] Y. Li, X. Feng, Z. Lu, H. Yin, F. Liu, Q. Xiang, Enhanced photocatalytic H<sub>2</sub>-production activity of C-dots modified g-C<sub>3</sub>N<sub>4</sub>/TiO<sub>2</sub> nanosheets composites, *J Colloid Interface Sci*, 513 (2018) 866-876. <https://doi.org/10.1016/j.jcis.2017.12.002>
- [5] J. Ma, X. Tan, T. Yu, X. Li, Fabrication of g-C<sub>3</sub>N<sub>4</sub>/TiO<sub>2</sub> hierarchical spheres with reactive {001} TiO<sub>2</sub> crystal facets and its visible-light photocatalytic activity, *Int. J. Hydrogen. Energ.*, 41 (2016) 3877-3887. <https://doi.org/10.1016/j.ijhydene.2015.12.191>
- [6] N. Guo, Y. Zeng, H. Li, X. Xu, H. Yu, X. Han, Novel mesoporous TiO<sub>2</sub>@g-C<sub>3</sub>N<sub>4</sub> hollow core@shell heterojunction with enhanced photocatalytic activity for water treatment and H<sub>2</sub> production under simulated sunlight, *J. Hazard. Mater.*, 353 (2018) 80-88. <https://doi.org/10.1016/j.jhazmat.2018.03.044>
